# Supplementary material
Source: PubMed Central journal article supplement (PMC5860470)
Supplement: kwx022_qinwebmaterialfinal.pdf [file kwx022_qinwebmaterialfinal.pdf]

## WEB MATERIAL

**Web Table 1.** Scoring Criteria for HEI-2005, HEI-2010 and AHEI-2010.

|                                                          | Component: minimum to maximum standards (maximum points) <sup>a,b</sup> |                               |                               |
|----------------------------------------------------------|-------------------------------------------------------------------------|-------------------------------|-------------------------------|
|                                                          | HEI-2005 (total score: 100)                                             | HEI-2010 (total score: 100)   | AHEI-2010 (total score: 110)  |
| <b>Vegetables</b>                                        |                                                                         |                               |                               |
| Total vegetables                                         | 0 to 1.1 cup/1,000 kcal (5)                                             | 0 to 1.1 cup/1,000 kcal (5)   |                               |
| Dark green and orange vegetables and legumes             | 0 to 0.4 cup/1,000 kcal (5)                                             |                               |                               |
| Greens and beans                                         |                                                                         | 0 to 0.2 cup/1,000 kcal (5)   |                               |
| Vegetables (not including potatoes)                      |                                                                         |                               | 0 to 5 servings (10)          |
| <b>Fruit</b>                                             |                                                                         |                               |                               |
| Total fruit (including fruit juice)                      | 0 to 0.8 cup/1,000 kcal (5)                                             | 0 to 0.8 cup/1,000 kcal (5)   |                               |
| Whole fruit (named Fruit in AHEI)                        | 0 to 0.4 cup/1,000 kcal (5)                                             | 0 to 0.4 cup/1,000 kcal (5)   | 0 to 4 servings (10)          |
| <b>Grains</b>                                            |                                                                         |                               |                               |
| Whole grains                                             | 0 to 1.5 oz/1,000 kcal (5)                                              | 0 to 1.5 oz/1,000 kcal (10)   | 0 to 5 oz (10)                |
| Total grains                                             | 0 to 3.0 oz/1,000 kcal (5)                                              |                               |                               |
| Refined grains                                           |                                                                         | 4.3 to 1.8 oz/1,000 kcal (10) |                               |
| <b>Dairy</b>                                             |                                                                         |                               |                               |
| Milk (renamed Dairy in HEI-2010)                         | 0 to 1.3 cup/1,000 kcal (10)                                            | 0 to 1.3 cup/1,000 kcal (10)  |                               |
| <b>Protein foods (meat, beans, peas, seafood, nuts)</b>  |                                                                         |                               |                               |
| Meat and beans (renamed Total Protein Foods in HEI-2010) | 0 to 2.5 oz/1,000 kcal (10)                                             | 0 to 2.5 oz/1,000 kcal (5)    |                               |
| Seafood and plant proteins                               |                                                                         | 0 to 0.8 oz/1,000 kcal (5)    |                               |
| Nuts and legumes                                         |                                                                         |                               | 0 to 1 serving (10)           |
| Red/processed meat                                       |                                                                         |                               | 1.5 to 0 serving (10)         |
| <b>Oils and fat</b>                                      |                                                                         |                               |                               |
| Oils                                                     | 0 to 12 g/1,000 kcal (10)                                               |                               |                               |
| Fatty acids, ratio of (PUFAs + MUFAs) to SFAs            |                                                                         | 1.2 to 2.5 (10)               |                               |
| Long chain (n-3) fats (EPA + DHA)                        |                                                                         |                               | 0 to 250 mg (10)              |
| PUFA (not include EPA or DHA intake)                     |                                                                         |                               | 2% to 10% of energy (10)      |
| Saturated fats                                           | 15% to 7% of energy (10) <sup>c</sup>                                   |                               |                               |
| Trans fat                                                |                                                                         |                               | 4 to 0.5 % of energy (10)     |
| Sodium                                                   | 2.0 to 0.7 g/1,000 kcal (10) <sup>c</sup>                               | 2.0 to 1.1 g/1,000 kcal (10)  | Highest to lowest decile (10) |
| Alcohol and other empty calories                         |                                                                         |                               |                               |

---

|                                           |                           |                            |
|-------------------------------------------|---------------------------|----------------------------|
| Calories from SoFAAS                      | 50% to 20% of energy (20) |                            |
| Empty calories <sup>d</sup>               |                           | 50% to 19% of energy (20)  |
| Sugar-sweetened beverages and fruit juice |                           | 1 to 0 serving (10)        |
| Alcohol                                   |                           | 0.5-1.5 to 2.5 drinks (10) |

---

AHEI, Alternate Healthy Eating Index; DHA, docosahexaenoic acid; EPA, eicosapentaenoic acid; HEI, Healthy Eating Index; MUFA, monounsaturated fatty acids; PUFA, polyunsaturated fatty acid; SoFAAS, solid fats, alcoholic beverages, and added sugars.

<sup>a</sup>Numbers are inclusive unless otherwise specified. For example, 0 to 5 servings represents min score was given to 0 serving and max score was given to those  $\geq 5$  servings.

<sup>b</sup>Intakes between min and max standards are scored proportionately except for Saturated fats and Sodium in HEI-2005.

<sup>c</sup>In HEI-2005, Saturated fats and Sodium get a score of 8 with  $<10\%$  total energy and  $<1.1$  g/1,000 kcal, respectively. Intakes between the standards for score 0 to 8 and 8 to 10 are scored proportionately.

<sup>d</sup>Calories from solid fat, alcohol, and added sugar; threshold for counting alcohol is  $>13$ g/1,000 kcal

---

**Web Table 2.** Associations between Dietary Quality Indices and Ovarian Cancer Risk Among All Participants and Stratified by Menopausal Status in the Propensity-Score (PS) Matched Sample, AACES 2010-14<sup>a,b</sup>

|                                  | No. of Cases | No. of Controls | PS Model |            |
|----------------------------------|--------------|-----------------|----------|------------|
|                                  |              |                 | OR       | 95% CI     |
| <i>Healthy Eating Index-2005</i> |              |                 |          |            |
| All women <sup>c</sup>           |              |                 |          |            |
| Q1                               | 97           | 91              | 1        | Referent   |
| Q2                               | 93           | 88              | 0.99     | 0.66, 1.49 |
| Q3                               | 90           | 90              | 0.94     | 0.62, 1.41 |
| Q4                               | 78           | 89              | 0.82     | 0.54, 1.25 |
| <i>p</i> -trend                  |              |                 |          | 0.35       |
| Per 10 points increase           |              |                 | 0.92     | 0.80, 1.06 |
| Premenopausal                    |              |                 |          |            |
| Q1                               | 33           | 29              | 1        | Referent   |
| Q2                               | 23           | 23              | 0.88     | 0.41, 1.89 |
| Q3                               | 18           | 21              | 0.75     | 0.34, 1.68 |
| Q4                               | 22           | 20              | 0.97     | 0.44, 2.12 |
| <i>p</i> -trend                  |              |                 |          | 0.79       |
| Per 10 points increase           |              |                 | 0.95     | 0.73, 1.23 |
| Postmenopausal                   |              |                 |          |            |
| Q1                               | 64           | 62              | 1        | Referent   |
| Q2                               | 70           | 65              | 1.04     | 0.64, 1.70 |
| Q3                               | 72           | 69              | 1.01     | 0.63, 1.63 |
| Q4                               | 56           | 69              | 0.79     | 0.48, 1.29 |
| <i>p</i> -trend                  |              |                 |          | 0.36       |
| Per 10 points increase           |              |                 | 0.91     | 0.77, 1.08 |
| <i>Healthy Eating Index-2010</i> |              |                 |          |            |
| All women <sup>c</sup>           |              |                 |          |            |
| Q1                               | 108          | 91              | 1        | Referent   |
| Q2                               | 93           | 88              | 0.89     | 0.59, 1.33 |
| Q3                               | 87           | 90              | 0.81     | 0.54, 1.22 |
| Q4                               | 70           | 89              | 0.66     | 0.44, 1.01 |
| <i>p</i> -trend                  |              |                 |          | 0.05       |
| Per 10 points increase           |              |                 | 0.86     | 0.75, 0.99 |
| Premenopausal                    |              |                 |          |            |
| Q1                               | 34           | 29              | 1        | Referent   |
| Q2                               | 21           | 22              | 0.81     | 0.37, 1.77 |
| Q3                               | 20           | 24              | 0.71     | 0.33, 1.54 |
| Q4                               | 21           | 18              | 1.00     | 0.45, 2.22 |
| <i>p</i> -trend                  |              |                 |          | 0.80       |
| Per 10 points increase           |              |                 | 0.92     | 0.72, 1.17 |
| Postmenopausal                   |              |                 |          |            |
| Q1                               | 74           | 62              | 1        | Referent   |
| Q2                               | 72           | 66              | 0.91     | 0.57, 1.47 |
| Q3                               | 67           | 66              | 0.85     | 0.53, 1.37 |

|                                            |     |    |      |            |
|--------------------------------------------|-----|----|------|------------|
| Q4                                         | 49  | 71 | 0.57 | 0.35, 0.95 |
| <i>p</i> -trend                            |     |    |      | 0.04       |
| Per 10 points increase                     |     |    | 0.84 | 0.71, 0.99 |
| <i>Alternate Healthy Eating Index-2010</i> |     |    |      |            |
| All women <sup>c</sup>                     |     |    |      |            |
| Q1                                         | 112 | 90 | 1    | Referent   |
| Q2                                         | 87  | 89 | 0.79 | 0.52, 1.18 |
| Q3                                         | 92  | 90 | 0.82 | 0.55, 1.23 |
| Q4                                         | 67  | 89 | 0.60 | 0.40, 0.92 |
| <i>p</i> -trend                            |     |    |      | 0.03       |
| Per 10 points increase                     |     |    | 0.80 | 0.69, 0.92 |
| Premenopausal                              |     |    |      |            |
| Q1                                         | 30  | 27 | 1    | Referent   |
| Q2                                         | 29  | 27 | 0.97 | 0.46, 2.02 |
| Q3                                         | 17  | 19 | 0.81 | 0.35, 1.86 |
| Q4                                         | 20  | 20 | 0.90 | 0.40, 2.02 |
| <i>p</i> -trend                            |     |    |      | 0.71       |
| Per 10 points increase                     |     |    | 0.94 | 0.73, 1.22 |
| Postmenopausal                             |     |    |      |            |
| Q1                                         | 82  | 63 | 1    | Referent   |
| Q2                                         | 58  | 62 | 0.72 | 0.44, 1.17 |
| Q3                                         | 75  | 71 | 0.81 | 0.51, 1.29 |
| Q4                                         | 47  | 69 | 0.52 | 0.32, 0.86 |
| <i>p</i> -trend                            |     |    |      | 0.02       |
| Per 10 points increase                     |     |    | 0.75 | 0.63, 0.88 |

CI, confidence interval; OR, odds ratio; PS, propensity score

<sup>a</sup>Propensity score nearest-neighbor matching included 5-year age group, state of residents, education, parity, oral contraceptive use, menopause status, tubal ligation, first-degree family history of breast/ovarian cancer, body mass index, physical activity and total energy intake.

<sup>b</sup> $P_{\text{trend}}$  was tested by treating the median value of each quartile as a continuous variable in the corresponding logistic regression model.

<sup>c</sup>Median score (range) from Q1 to Q4 of HEI-2005: 49.4 (36.4-54.0), 58.2 (54.1-61.9), 65.7 (62.0-69.6) and 74.9 (69.7-88.2); HEI-2010: 50.0 (29.8-55.3), 59.3 (55.4-62.7), 66.3 (62.8-70.8) and 77.0 (70.9-91.9); AHEI-2010: 42.7 (27.9-46.4), 49.7 (46.5-52.6), 56.1 (52.7-60.2) and 69.2 (60.3-86.8)

**Web Table 3.** Association of Dietary Quality Indices and Ovarian Cancer Risk by Histology among All, Pre- and Post-Menopausal Women, AACES 2010-14<sup>a</sup>

| Histology             | Case<br><i>n</i> (%) | Control<br><i>n</i> | HEI-2005               |            |                         | HEI-2010               |            |                         | AHEI-2010              |            |                         |
|-----------------------|----------------------|---------------------|------------------------|------------|-------------------------|------------------------|------------|-------------------------|------------------------|------------|-------------------------|
|                       |                      |                     | per 10 points increase |            |                         | per 10 points increase |            |                         | per 10 points increase |            |                         |
|                       |                      |                     | OR                     | 95% CI     | <i>P</i> <sub>het</sub> | OR                     | 95% CI     | <i>P</i> <sub>het</sub> | OR                     | 95% CI     | <i>P</i> <sub>het</sub> |
| <b>All women</b>      |                      |                     |                        |            |                         |                        |            |                         |                        |            |                         |
| Serous                | 239 (57.6)           | 629                 | 0.93                   | 0.79, 1.09 | 0.57                    | 0.88                   | 0.75, 1.03 | 0.72                    | 0.78                   | 0.66, 0.91 | 0.15                    |
| Endometrioid          | 52 (12.5)            | 629                 | 0.92                   | 0.67, 1.28 |                         | 0.84                   | 0.61, 1.15 |                         | 0.91                   | 0.67, 1.23 |                         |
| <b>Premenopausal</b>  |                      |                     |                        |            |                         |                        |            |                         |                        |            |                         |
| Serous                | 52 (46.9)            | 193                 | 0.99                   | 0.69, 1.42 | 0.93                    | 1.02                   | 0.72, 1.45 | 0.59                    | 0.99                   | 0.70, 1.39 | 0.60                    |
| Endometrioid          | 25 (22.5)            | 193                 | 0.82                   | 0.50, 1.36 |                         | 0.79                   | 0.50, 1.23 |                         | 0.80                   | 0.51, 1.25 |                         |
| <b>Postmenopausal</b> |                      |                     |                        |            |                         |                        |            |                         |                        |            |                         |
| Serous                | 187 (61.5)           | 436                 | 0.90                   | 0.75, 1.08 | 0.69                    | 0.82                   | 0.68, 0.98 | 0.67                    | 0.69                   | 0.57, 0.83 | 0.17                    |
| Endometrioid          | 27 (8.9)             | 436                 | 0.92                   | 0.58, 1.45 |                         | 0.77                   | 0.48, 1.25 |                         | 0.82                   | 0.53, 1.29 |                         |

AHEI, Alternate Healthy Eating Index; HEI, Healthy Eating Index

<sup>a</sup>Model adjusted for age, region, education, parity, oral contraceptive use, menopause status, tubal ligation, first-degree family history of breast/ovarian cancer, body mass index, physical activity and total energy intake

**Web Table 4.** Association of Each Component Score of the Healthy Eating Index-2005 with Ovarian Cancer Risk Among All and by Menopausal Status, AACES 2010-14

|                                                                                  | Criteria for  |               | Index specific OR (95% CI) <sup>a,b</sup> |                             |                              |
|----------------------------------------------------------------------------------|---------------|---------------|-------------------------------------------|-----------------------------|------------------------------|
|                                                                                  | minimum score | maximum score | Among all<br>Ca:Co (415/629)              | Pre-menopausal<br>(111/193) | Post-menopausal<br>(304/436) |
| Healthy Eating Index-2005 component (max points)                                 |               |               |                                           |                             |                              |
| Total vegetables (5), cup eq./per 1,000 kcal                                     | 0             | ≥1.1          | 0.79 (0.69, 0.90)                         | 0.71 (0.54, 0.94)           | 0.81 (0.69, 0.94)            |
| Dark green and orange vegetables and legumes (5), cup eq./per 1,000 kcal         | 0             | ≥0.4          | 0.86 (0.77, 0.96)                         | 0.84 (0.68, 1.04)           | 0.85 (0.75, 0.97)            |
| Total fruit (5), <sup>c</sup> cup eq./ 1,000 kcal                                | 0             | ≥0.8          | 1.14 (1.02, 1.27)                         | 1.18 (0.94, 1.47)           | 1.13 (1.00, 1.29)            |
| Whole fruit (5), cup eq./ per 1,000 kcal                                         | 0             | ≥0.4          | 1.00 (0.90, 1.12)                         | 1.13 (0.91, 1.41)           | 0.94 (0.82, 1.07)            |
| Whole grains (5), oz eq./per 1,000 kcal                                          | 0             | ≥1.5          | 1.04 (0.93, 1.16)                         | 1.01 (0.78, 1.29)           | 1.05 (0.93, 1.19)            |
| Total grains (5), oz eq./per 1,000 kcal                                          | 0             | ≥3.0          | 1.06 (0.92, 1.21)                         | 0.97 (0.72, 1.30)           | 1.11 (0.95, 1.30)            |
| Milk (10), cup eq./1,000 kcal                                                    | 0             | ≥1.3          | 1.06 (1.00, 1.12)                         | 1.10 (0.96, 1.25)           | 1.05 (0.98, 1.12)            |
| Meat and beans (10), oz eq./1,000 kcal                                           | 0             | ≥2.5          | 0.91 (0.82, 1.00)                         | 0.77 (0.63, 0.94)           | 0.95 (0.85, 1.07)            |
| Oils (10), g/1,000 kcal                                                          | 0             | ≥12           | 0.99 (0.92, 1.05)                         | 0.99 (0.86, 1.13)           | 0.98 (0.91, 1.06)            |
| Saturated fat (10), <sup>b</sup> % of energy                                     | ≥15           | ≤7            | 1.01 (0.96, 1.06)                         | 1.02 (0.93, 1.13)           | 0.99 (0.94, 1.05)            |
| Sodium (10), <sup>b</sup> g/1,000 kcal                                           | ≥2.0          | ≤0.7          | 1.03 (0.97, 1.10)                         | 1.05 (0.93, 1.19)           | 1.03 (0.95, 1.11)            |
| Calories from solid fat, alcohol, and added sugar (20), <sup>b</sup> % of energy | ≥50           | ≤20           | 0.98 (0.95, 1.01)                         | 1.01 (0.94, 1.07)           | 0.97 (0.93, 1.00)            |

AHEI, Alternate Healthy Eating Index; HEI, Healthy Eating Index

<sup>a</sup>Model adjusted for age, region, education, parity, oral contraceptive use, menopause status, tubal ligation, first-degree family history of breast/ovarian cancer, body mass index, physical activity, total energy intake, and the overall index score without the component under study.

<sup>b</sup>Estimates for 1-score increase. For components that were reverse scored, higher score indicates lower intake.

<sup>c</sup>Total fruit includes fruit juice, whole fruit does not.
